# Supplementary material
Source: PubMed Central journal article supplement (PMC4922646)

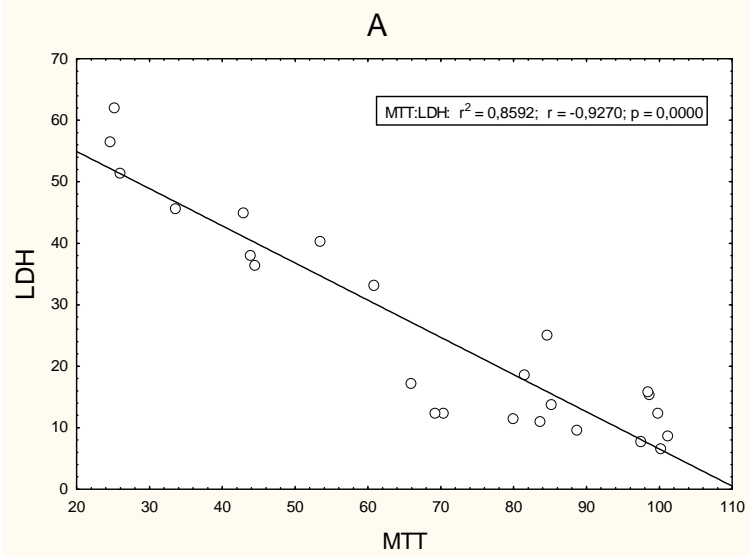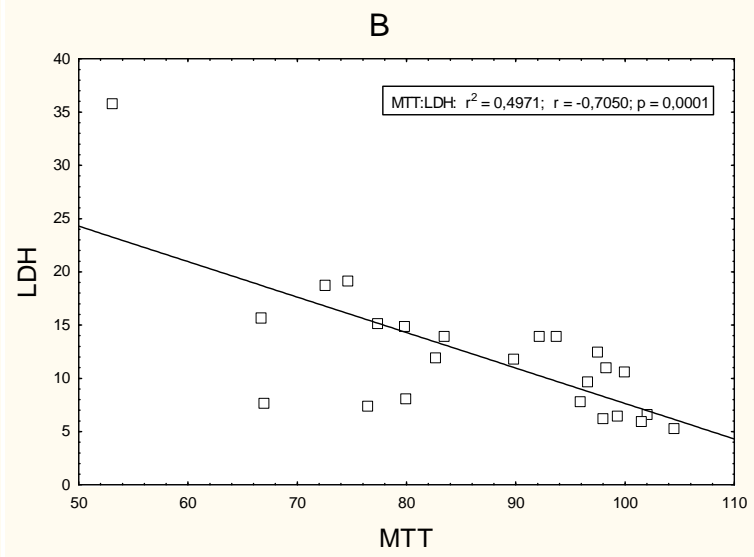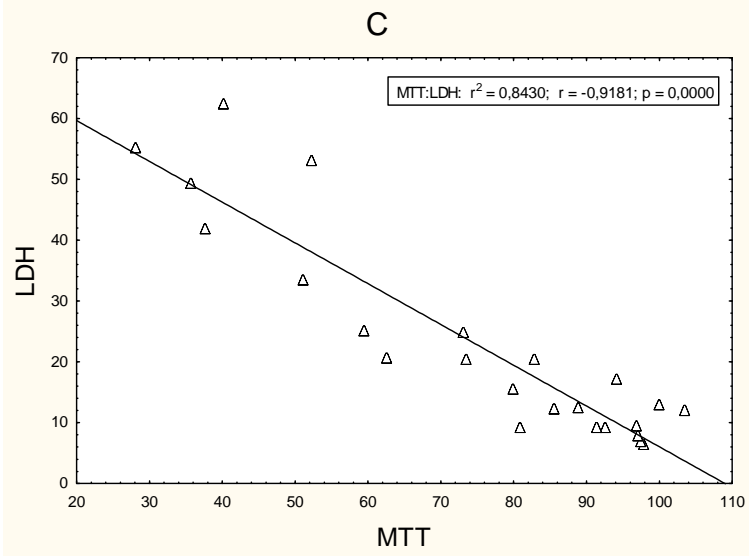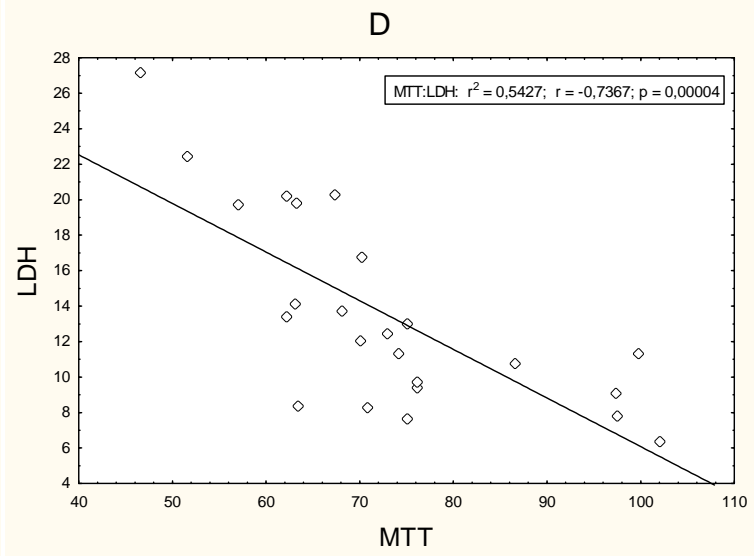

Supplement: NIHMS795489-supplement-Supplemental_File.pdf [file NIHMS795489-supplement-Supplemental_File.pdf]
